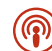

# Association of Tryptophan Metabolites with Incident Type 2 Diabetes in the PREDIMED Trial: A Case-Cohort Study

Edward Yu,<sup>1,2</sup> Christopher Papandreou,<sup>3,4</sup> Miguel Ruiz-Canela,<sup>4,5,6</sup> Marta Guasch-Ferre,<sup>1,3,4</sup> Clary B. Clish,<sup>7</sup> Courtney Dennis,<sup>7</sup> Liming Liang,<sup>8</sup> Dolores Corella,<sup>4,9</sup> Montserrat Fitó,<sup>4,10</sup> Cristina Razquin,<sup>4,5,6</sup> José Lapetra,<sup>4,11</sup> Ramón Estruch,<sup>4,12</sup> Emilio Ros,<sup>4,13</sup> Montserrat Cofán,<sup>4,13</sup> Fernando Arós,<sup>4,14</sup> Estefania Toledo,<sup>4,5,6</sup> Lluís Serra-Majem,<sup>4,15</sup> José V. Sorlí,<sup>4,9</sup> Frank B. Hu,<sup>1,2,16</sup> Miguel A. Martinez-Gonzalez,<sup>1,4,5,6</sup> and Jordi Salas-Salvado<sup>3,4\*</sup>

**BACKGROUND:** Metabolites of the tryptophan–kynurenine pathway (i.e., tryptophan, kynurenine, kynurenic acid, quinolinic acid, 3-hydroxyanthranilic) may be associated with diabetes development. Using a case–cohort design nested in the Prevención con Dieta Mediterránea (PREDIMED) study, we studied the associations of baseline and 1-year changes of these metabolites with incident type 2 diabetes (T2D).

**METHODS:** Plasma metabolite concentrations were quantified via LC-MS for  $n = 641$  in a randomly selected subcohort and 251 incident cases diagnosed during 3.8 years of median follow-up. Weighted Cox models adjusted for age, sex, body mass index, and other T2D risk factors were used.

**RESULTS:** Baseline tryptophan was associated with higher risk of incident T2D (hazard ratio = 1.29; 95% CI, 1.04–1.61 per SD). Positive changes in quinolinic acid from baseline to 1 year were associated with a higher risk of T2D (hazard ratio = 1.39; 95% CI, 1.09–1.77 per SD). Baseline tryptophan and kynurenic acid were directly associated with changes in homeostatic model assessment for insulin resistance (HOMA-IR) from baseline to 1 year. Concurrent changes in kynurenine, quinolinic acid, 3-hydroxyanthranilic acid, and kynurenine/tryptophan ratio were associated with baseline-to-1-year changes in HOMA-IR.

phan ratio were associated with baseline-to-1-year changes in HOMA-IR.

**CONCLUSIONS:** Baseline tryptophan and 1-year increases in quinolinic acid were positively associated with incident T2D. Baseline and 1-year changes in tryptophan metabolites predicted changes in HOMA-IR. Tryptophan levels may initially increase and then deplete as diabetes progresses in severity.

© 2018 American Association for Clinical Chemistry

Type 2 diabetes (T2D)<sup>17</sup> remains a global health concern (1). Recent metabolomics screens have identified tryptophan metabolites as potential biological mediators in the development of T2D (2–5). The majority of free tryptophan in humans is metabolized through the tryptophan–kynurenine pathway (6), producing one equivalent of nicotinamide adenine dinucleotide for each equivalent of tryptophan. Intermediates in this pathway include kynurenine, kynurenic acid, quinolinic acid, and 3-hydroxyanthranilic acid. The conversion of tryptophan to kynurenine is catalyzed by the rate-limiting enzymes indoleamine 2, 3-dioxygenase 1 (IDO1), indoleamine 2, 3-dioxygenase 2 (IDO2), and tryptophan 2, 3-dioxygenase, which are upregulated in

<sup>1</sup> Department of Nutrition, Harvard T.H. Chan School of Public Health, Boston, MA; <sup>2</sup> Department of Epidemiology, Harvard T.H. Chan School of Public Health, Boston, MA; <sup>3</sup> Human Nutrition Unit, Faculty of Medicine and Health Sciences, Institut d'Investigació Sanitària Pere Virgili, Rovira i Virgili University, Reus, Spain; <sup>4</sup> CIBER Fisiopatología de la Obesidad y Nutrición (CIBEROBN), Instituto de Salud Carlos III (ISCIII), Madrid, Spain; <sup>5</sup> Department of Preventive Medicine and Public Health, University of Navarra, Pamplona, Spain; <sup>6</sup> IdiSNA (Instituto de Investigación Sanitaria de Navarra), Navarra, Spain; <sup>7</sup> Broad Institute of MIT and Harvard University, Cambridge, MA; <sup>8</sup> Department of Biostatistics, Harvard T.H. Chan School of Public Health, Boston, MA; <sup>9</sup> Department of Preventive Medicine, University of Valencia, Valencia, Spain; <sup>10</sup> Cardiovascular and Nutrition Research Group, Institut de Recerca Hospital del Mar, Barcelona, Spain; <sup>11</sup> Department of Family Medicine, Unit Research, Distrito Sanitario Atención Primaria Sevilla, Sevilla, Spain; <sup>12</sup> Department of Internal Medicine Institut d'Investigacions Biomèdiques August Pi Sunyer (IDI- BAPS), Hospital Clinic, University of Barcelona, Barcelona, Spain; <sup>13</sup> Lipid Clinic, Department of Endocrinology and Nutrition (IDIBAPS), Hospital Clinic, University of Barcelona, Barcelona, Spain; <sup>14</sup> Department of Cardiology,

University Hospital of Álava, Vitoria, Spain; <sup>15</sup> Research Institute of Biomedical and Health Sciences, University of Las Palmas de Gran Canaria, Las Palmas, Spain; <sup>16</sup> Channing Division for Network Medicine, Department of Medicine, Brigham and Women's Hospital and Harvard Medical School, MA.

\* Address correspondence to this author at: Human Nutrition Unit, Faculty of Medicine and Health Sciences, Universitat Rovira i Virgili, St/Sant Llorenç 21, 43201 Reus, Spain. Fax 617-432-1333; e-mail jordi.salas@urv.cat.

Received February 20, 2018; accepted May 14, 2018.

Previously published online at DOI: 10.1373/clinchem.2018.288720

© 2018 American Association for Clinical Chemistry

<sup>17</sup> Nonstandard abbreviations: T2D, type 2 diabetes; IDO, indoleamine 2,3-dioxygenase; P5P, pyridoxal-5-phosphate; PREDIMED, Prevención con Dieta Mediterránea; HOMA-IR, homeostatic model assessment of insulin resistance; MedDiet, Mediterranean Diet; EVOO, extra virgin olive oil; Kyn, kynurenine; Trp, tryptophan; MD, mean difference; 3-HAA, 3-hydroxyanthranilic acid.

T2D patients (7, 8). IDO1 activity may be increased by proinflammatory cytokines, such as interferon; this increase shifts the equilibrium of this pathway downstream away from tryptophan (9, 10). Further downstream conversion of kynurenine to 3-hydroxyanthranilic acid is catalyzed by enzymes dependent on pyridoxal-5-phosphate (P5P) as a cofactor (11), which is deficient in diabetogenic states (12).

Studies of tryptophan metabolism and T2D in human populations are sparse. Cross-sectional studies have identified increased plasma concentrations of kynurenine, 5-hydroxyanthranilic acid, and kynurenic acid in diabetics and insulin-resistant individuals (4, 13) and lower concentrations of tryptophan in nondiabetics (4). The ratio of plasma kynurenine to tryptophan has also been reported to be directly correlated with insulin resistance (14) and T2D (15). These results suggest that tryptophan metabolites may play an important role in T2D pathogenesis.

The current study employs a case-cohort design of participants free of diabetes at baseline, nested within the Prevención con Dieta Mediterránea (PREDIMED) trial. In a previous report (16), we reported that 1-year changes in tryptophan strongly predicted lower risk of incident myocardial infarction and composite cardiovascular disease. Thus, we hypothesized that plasma tryptophan would be inversely associated with T2D. Our primary objectives were to address (a) whether baseline and 1-year changes in plasma tryptophan metabolites (tryptophan, kynurenine, kynurenic acid, quinolinic acid, 3-hydroxyanthranilic acid) were associated with T2D development; (b) whether baseline concentrations of these metabolites were associated with 1-year changes in homeostatic model assessment for insulin resistance (HOMA-IR); and (c) whether a Mediterranean Diet (MedDiet) intervention could offset the harmful consequences of an unfavorable metabolite profile.

## Methods

### STUDY DESIGN AND POPULATION

The PREDIMED is a primary prevention, large multicenter trial based in Spain ([www.predimed.es](http://www.predimed.es)). The methods of the PREDIMED trial are reported elsewhere (17). Briefly, 7447 participants who were free of cardiovascular disease but at high cardiovascular risk were allocated to 3 groups: (a) a MedDiet supplemented with extra virgin olive oil (MedDiet + EVOO); (b) a MedDiet supplemented with mixed nuts (MedDiet + nuts); or (c) a control diet in which participants were advised to reduce total fat intake. No calorie restriction or physical activity was advised. Participants were selected to the PREDIMED trial on the basis of either prevalent T2D or 3 or more major cardiovascular risk factors (smoking, hypertension, increased low-density lipoprotein cholesterol, decreased high-density lipoprotein cholesterol, overweight or obesity, or a family history of premature coronary heart disease).

terol, decreased high-density lipoprotein cholesterol, overweight or obesity, or a family history of premature coronary heart disease).

Within the PREDIMED cohort, 3541 participants did not have T2D at baseline. Among nondiabetics at baseline, individuals allocated to the 2 MedDiet groups had a 30% significantly lower risk of T2D than those in the control group (18). The present case-cohort study sample consisted of a random subcohort of 694 nondiabetic participants selected at baseline (approximately 20%) from all T2D-free individuals of the PREDIMED cohort who had available plasma samples and all incident cases ( $n = 251$ ) of T2D during a median follow-up period of 3.8 years with available samples (samples were unavailable for 22 out of the 273 incident T2D cases occurring in PREDIMED). Institutional Review Boards at each recruitment center approved the study protocol, and participants provided written informed consent.

### COVARIATE ASSESSMENT

At baseline and yearly follow-up visits, a questionnaire about lifestyle variables (i.e., diet, physical activity, smoking), history of illnesses, medication use, and family history of disease was given. Physical activity was assessed with the validated Spanish version of the Minnesota Leisure-Time Physical Activity questionnaire (19). Participants were considered to have hypercholesterolemia or hypertension if a physician had previously diagnosed them with the condition and/or they were being treated with cholesterol-lowering or antihypertensive agents, respectively. Trained personnel ascertained anthropometric and blood pressure measurements.

### BLOOD SPECIMENS AND METABOLITE PROFILING

Fasting blood samples were collected at baseline, 1 year, and biennial intervals thereafter. Plasma samples among diabetes-free patients at baseline (many of whom would develop incident diabetes later on) were collected to preserve the prospective nature of the study. After an overnight fast, plasma EDTA tubes were collected, and, after centrifugation, aliquots were frozen at  $-80^{\circ}$ . In June 2015, pairs of samples (baseline and first-year visits from each participant) were randomly shipped on dry ice to the Broad Institute for metabolomics analyses.

Tryptophan-kynurenine metabolites (tryptophan, kynurenine, kynurenic acid, quinolinic acid, 3-hydroxyanthranilic acid) were measured by LC-MS, as previously described (20–22). Kynurenine and quinolinic acid were measured using an LC-MS system that comprised an Aquity UPLC system (Waters and a 5500 QTRAP mass spectrometer, SCIEX). Metabolites were extracted from plasma (30  $\mu$ L) with 120  $\mu$ L of 80% methanol containing inosine-15N<sub>4</sub>, thymine-d<sub>4</sub>, and glycocholate-d<sub>4</sub> internal standards (Cambridge Isotope Laboratories). The samples were centrifuged (10 min,

9000g, 4 °C), and the supernatants (10  $\mu$ L) were injected directly onto a 150-  $\times$  2.0-mm Luna NH2 column (Phenomenex). The column was eluted at a flow rate of 400  $\mu$ L/min, with initial conditions of 10% mobile phase A (20 mmol/L ammonium acetate and 20 mmol/L ammonium hydroxide in water) and 90% mobile phase B [10 mmol/L ammonium hydroxide in 75:25 (volume:volume) acetonitrile/methanol], followed by a 10-min linear gradient to 100% mobile phase A. Mass spectrometer analyses were carried out by electrospray ionization and selective multiple reaction monitoring scans in the negative ion mode. To create the method, declustering potentials and collision energies were optimized for each metabolite by infusion of reference standards (20). The ion spray voltage was -4.5 kV, and the source temperature was 500 °C. Data were processed and visually inspected for quality of peak integration with MultiQuant software (SCIEX). Tryptophan, kynurenic acid, and 3-hydroxyanthranilic acid were profiled with a Shimadzu Nexera  $\times$ 2 U-HPLC (Shimadzu Corp.) coupled to a Q Exactive hybrid quadrupole orbitrap mass spectrometer (Thermo Fisher Scientific). Metabolites were extracted from plasma (10  $\mu$ L) with 90  $\mu$ L of 74.9:24.9:0.2 (volume:volume:volume) of acetonitrile:methanol:formic acid-containing stable isotope-labeled internal standards [valine-d8 (Sigma-Aldrich) and phenylalanine-d8 (Cambridge Isotope Laboratories)]. The samples were centrifuged (10 min; 9000g; 4 °C), and supernatants (10  $\mu$ L) were injected directly onto a 150-  $\times$  2-mm, 3- $\mu$ m Atlantis HILIC column (Waters). The column was eluted isocratically at a flow rate of 250  $\mu$ L/min with 5% mobile phase A (10 mmol ammonium formate/L and 0.1% formic acid in water) for 0.5 min, followed by a linear gradient to 40% mobile phase B (acetonitrile with 0.1% formic acid) over 10 min. Full scan mass spectra >70–800  $m/z$  were acquired in the positive ion and at 70 000 resolution and 3-Hz data-acquisition rate. Other mass spectrometer settings were as follows: sheath gas, 40; sweep gas, 2; spray voltage, 3.5 kV; capillary temperature, 350 °C; S-lens, 40; heater temperature, 300 °C; microscans, 1; automatic gain control target, 1E6; and maximum ion time, 250 ms. Metabolite identities were confirmed with authentic reference standards. Raw data were processed by TraceFinder 3.1 (Thermo Fisher Scientific) and Progenesis QI (Non-linear Dynamics).

To enable assessment of data quality and to facilitate data standardization across the analytical queue and sample batches, pairs of pooled plasma reference samples were analyzed at intervals of approximately 20 study samples. One sample from each pair of pooled references served as a passive QC sample to evaluate the analytical reproducibility for measurement of each metabolite, while the other pooled sample was used to standardize data by a “nearest neighbor” approach. Standardized val-

ues were calculated with the ratio of the value in each sample over the nearest pooled plasma reference multiplied by the median value measured across the pooled references. After standardization, the CVs measured among 124 pooled QC samples in the negative ion mode method were 10.2% for kynurenic acid and 17.0% for quinolinic acid. Among 92 pooled QC samples measured in the positive ion mode method, the CVs were 2.2% for tryptophan, 11.2% for kynurenic acid, and 39.4% for 3-hydroxyanthranilic acid.

Fasting glucose was measured with an enzymatic method to convert glucose to 6-phosphogluconate (Advia Chemistry Systems). The intra- and interassay CVs were 1.2% and 1.6%, respectively. Fasting insulin concentrations were measured with an immunoassay (Advia Chemistry Systems) with an intra- and interassay coefficient of variation equal to 3.7% and 4.4%, respectively. Insulin resistance was computed by use of the HOMA-IR method ( $\text{HOMA-IR} = \text{fasting insulin} \times \text{fasting glucose}/405$ , in which insulin is in  $\mu$ U/mL and glucose is in mg/dL) at baseline and 1 year (23).

#### ASSESSMENT OF TYPE 2 DIABETES

The PREDIMED protocol originally included T2D as a secondary endpoint. The adjudication of new diagnoses of incident cases of T2D during follow-up was performed by the Clinical Endpoint Committee of the PREDIMED, an ad hoc panel of physicians (18). Diagnosis of T2D was considered on the basis of 2 confirmations of fasting plasma glucose  $\geq 126$  mg/dL (7.0 mmol/L) or 2-h plasma glucose  $\geq 200$  mg/dL (11.1 mmol/L) after a 75-g oral glucose load (24). Only confirmed cases were included in the statistical analyses. The Clinical Endpoint Committee was blinded to the intervention group and identities of the patients.

#### STATISTICAL ANALYSIS

Individual metabolite values were first normalized by a rank-based inverse normal transformation (25). We also considered the ratio of plasma kynurenic acid to tryptophan (Kyn/Trp ratio) by dividing raw values for each participant and then inverse normalizing the ratio. Quartile cutoff points of each metabolite and Kyn/Trp ratio were generated on the basis of the distributions of metabolites among noncases. We calculated correlations between each inverse normal transformed metabolite under study with Spearman  $\rho$ . Baseline-to-1-year changes in plasma metabolite values according to intervention group were calculated by generalized estimating equations with adjustment for covariates and setting recruitment center as a random effect (by LSMEANS with PROC MIXED in SAS).

For the primary analyses, we fitted Cox regression models with the use of Barlow weights (i.e., inverse probability of selection weights) to account for the oversampling of cases and implemented a sandwich variance

estimator to correct for correlated risk sets (26). We calculated hazard ratios and their 95% CI in relation to T2D for each metabolite specified as both categorical (quartiles) and continuous (per standard deviation) variables. Follow-up time was defined as the date of enrollment to the date of diagnosis of T2D for cases and to the date of the last visit or the end of the follow-up period for noncases (December 1, 2010). All models were stratified by recruitment center. In Model 1, we adjusted for age (years), sex (male or female), and intervention group (control, MedDiet + EVOO, MedDiet + nuts). In Model 2, we additionally adjusted for smoking status (never, current, or former), body mass index ( $\text{kg}/\text{m}^2$ ), leisure-time physical activity (metabolic equivalent task, min/day), hypertension (yes or no) dyslipidemia (yes or no), and baseline plasma glucose (with a quadratic term to account for nonlinearity). We conducted a test for linearity by examining an ordinal score based on the median value in each quartile of the metabolites. Two-sided *P* values were reported according to an  $\alpha$  level = 0.05 after adjustment for 6 tests by the False Discovery Rate method (27).

We further examined the associations between 1-year changes in individual metabolites and Kyn/Trp ratio and risk of T2D. We first calculated the difference between baseline and 1-year values and then normalized this difference with the inverse normal transformation. For this analysis, we excluded individuals with <1 year of follow-up, T2D cases diagnosed during the first year of follow-up, or without available samples at 1 year. All change analyses were adjusted by the respective baseline metabolite values. We also tested potential effect modification by age (<65,  $\geq 65$  years), sex (male or female), intervention group (control, MedDiet combined for additional power), body mass index (<30,  $\geq 30$   $\text{kg}/\text{m}^2$ ), smoking (never, former, or current), hypertension (yes or no), dyslipidemia (yes or no) on the relationship between baseline tryptophan and T2D. Likelihood ratio tests were used to assess the significance of interactions between the stratifying variables and baseline tryptophan by use of the difference in number of variables as the appropriate degrees of freedom to report the *P* for interaction ( $P_{\text{int}}$ ). Finally, we examined the association between baseline metabolites and 1-year changes of HOMA-IR by using generalized linear models accounting for within-recruitment center clustering and adjusting for covariates. Results were reported as the least squares mean differences (MD) (LSMEANS statement in SAS). All statistical analyses were performed with SAS version 9.4 (SAS Institute Inc.).

## Results

The final study sample consisted of a random subcohort of 694 nondiabetic participants and 251 incident cases of

T2D occurring through a median of 3.8 years of intervention with available samples. Of the 892 unique participants, 641 were included in the subcohort; 53 of the subcohort developed T2D and 198 were incident T2D cases not in the subcohort, for a total of 251 cases. In addition, 663 participants (505 noncases and 157 cases) had samples at 1 year and were included in the 1-year change analyses. Baseline descriptive characteristics of the subcohort according to quartiles of plasma tryptophan are shown in Table 1. Higher concentrations of baseline plasma tryptophan were associated with younger age, male sex, lower prevalence of dyslipidemia, and lower proportion of never-smokers.

Fig. 1 in the Data Supplement that accompanies the online version of this article at <http://www.clinchem.org/content/vol64/issue8> depicts the correlation matrix of the metabolites under study at baseline. Quinolinic acid was correlated with kynurenine ( $r = 0.58$ ), while quinolinic acid was not correlated with tryptophan ( $r = -0.04$ ). In general, all other correlations were moderate (Spearman  $\rho$  ranging from 0.10 to 0.33) and significant ( $P < 0.05$ ). Fig. 1 shows adjusted mean 1-year changes in the metabolites under study by intervention group. Individuals allocated to each of the 2 active intervention arms largely experienced decreases in these plasma metabolites, whereas individuals allocated to the control arm experienced increases in all these plasma metabolites except tryptophan.

## BASELINE AND 1-YEAR CHANGES IN TRYPTOPHAN METABOLITES AND TYPE 2 DIABETES

Table 2 displays results for the analysis of baseline tryptophan metabolites with incident T2D. In fully adjusted models, baseline tryptophan was prospectively associated with a slightly higher risk of T2D (*P* trend = 0.045). Associations of changes in metabolites from baseline to 1 year with T2D incidence are shown in Table 3. After adjusting for potential confounders and multiple testing, continuous 1-year changes in quinolinic acid (hazard ratio per SD = 1.39; 95% CI, 1.09–1.77; *P* = 0.047) showed a positive association with T2D incidence.

Table 4 shows the associations between baseline metabolite levels and 1-year changes in HOMA-IR. Baseline tryptophan (MD per SD = 0.67; 95% CI, 0.46–0.88) and kynurenic acid (MD per SD = 0.35; 95% CI, 0.23–0.47) were directly associated with changes in HOMA-IR in fully adjusted models. The baseline Kyn/Trp ratio was inversely associated with HOMA-IR (MD per SD =  $-0.18$ ; 95% CI,  $-0.34$  to  $-0.03$ ). Table 5 shows the associations between 1-year changes in metabolites and 1-year changes in HOMA-IR. In fully adjusted models, positive changes in kynurenine (MD per SD = 0.39, 95% CI = 0.17–0.60), quinolinic acid (MD per SD = 0.49; 95% CI, 0.18–0.80), 3-HAA (MD per SD = 0.23; 95% CI, 0.17–0.30), and Kyn/Trp ratio



**Table 1.** Participant's baseline characteristics of the subcohort (n = 694).<sup>a</sup>

|                                             | Baseline plasma tryptophan |              |             |              | P value <sup>b</sup> |
|---------------------------------------------|----------------------------|--------------|-------------|--------------|----------------------|
|                                             | Quartile 1                 | Quartile 2   | Quartile 3  | Quartile 4   |                      |
| N                                           | 167                        | 172          | 174         | 181          |                      |
| Age, years                                  | 67.5 ± 5.4                 | 66.8 ± 6.1   | 66.2 ± 5.6  | 65.6 ± 5.6   | 0.01                 |
| Sex, % women                                | 80.2                       | 65.7         | 58.6        | 48.1         | <0.01                |
| Intervention group, %                       |                            |              |             |              |                      |
| MedDiet + EVOO                              | 34.1                       | 30.8         | 28.7        | 29.3         | 0.08                 |
| MedDiet + nuts                              | 31.7                       | 36.1         | 38.5        | 42.0         |                      |
| Control                                     | 34.1                       | 33.1         | 32.8        | 28.7         |                      |
| Hypertension, %                             | 86.8                       | 93.6         | 91.4        | 91.2         | 0.29                 |
| Dyslipidemia, %                             | 88.0                       | 90.7         | 83.3        | 78.5         | <0.01                |
| Smoking, %                                  |                            |              |             |              |                      |
| Never                                       | 70.7                       | 59.3         | 55.8        | 58.6         | 0.02                 |
| Former                                      | 16.2                       | 26.2         | 20.7        | 27.1         |                      |
| Current                                     | 13.2                       | 14.5         | 23.6        | 14.4         |                      |
| Waist circumference, cm                     | 99.2 ± 10.5                | 98.9 ± 9.9   | 99.3 ± 11.4 | 100.8 ± 11.0 | 0.35                 |
| Leisure-time physical activity (MET), min/d | 198 ± 189                  | 250 ± 21     | 263 ± 275   | 240 ± 242    | 0.06                 |
| Body mass index, kg/m <sup>2</sup>          | 30.0 ± 3.6                 | 30.0 ± 3.4   | 29.7 ± 3.5  | 30.1 ± 3.8   | 0.61                 |
| Total energy intake, kcal/d                 | 2249 ± 522                 | 2270 ± 586   | 2273 ± 540  | 2314 ± 608   | 0.74                 |
| MedDiet score (0 to 14 score) <sup>c</sup>  | 8.6 ± 2.0                  | 8.5 ± 1.9    | 8.6 ± 2.1   | 8.7 ± 1.9    | 0.68                 |
| Baseline glucose, mg/dl                     | 101.7 ± 15.4               | 100.8 ± 16.0 | 99.1 ± 14.5 | 97.6 ± 15.8  | 0.07                 |

<sup>a</sup> Continuous variables ± standard deviation.  
<sup>b</sup> Mantel-Haenszel chi-squared P value for categorical variables and ANOVA P values for continuous variables.  
<sup>c</sup> MedDiet score was calculated by responses on a 14-item questionnaire. Higher score signifies greater adherence to a Mediterranean diet pattern.

(MD per SD = 0.23; 95% CI, 0.16–0.31) were associated with increases in HOMA-IR by year 1.

#### EFFECT MODIFICATION BY DIETARY INTERVENTION AND OTHER VARIABLES

We tested whether a Mediterranean dietary intervention could potentially offset the positive associations of tryptophan with T2D (see Table 1 in the online Data Supplement). Using baseline tryptophan as the primary exposure, we observed no significant effect modification by dietary intervention, sex, age, obesity status, smoking status, baseline hypertension, or baseline dyslipidemia (see Table 2 in the online Data Supplement).

#### Discussion

In the present case-cohort study, we report that baseline tryptophan and 1-year increase in quinolinic acid were prospectively associated with higher T2D risk. Baseline tryptophan and kynurenic acid additionally predicted significant increases in HOMA-IR after 1 year, while concurrent positive changes in kynurenine, quinolinic acid, 3-HAA, and Kyn/Trp ratio predicted increases in

HOMA-IR. Furthermore, we report no significant effect modification by intervention group on the relationship between baseline tryptophan and T2D. Interestingly, in both active intervention groups, but not in the control group, with Mediterranean-type diets we found reduced levels of most metabolites.

Our study adds to the growing body of literature on the tryptophan–kynurenine pathway in T2D pathophysiology. Previous metabolite profiling studies with T2D exist, but to our knowledge, the present study is the first to prospectively examine metabolites in the tryptophan–kynurenine pathway with T2D in the context of a dietary trial. Because tryptophan cannot be synthesized in humans, dietary tryptophan intake is the primary determinant of tryptophan availability (28). Wang et al. previously reported in a large prospective study of 2422 normoglycemic individuals that baseline plasma tryptophan concentrations were positively associated with later incident T2D (5). In a cross-sectional analysis of 213 participants, Chen et al. similarly reported that serum tryptophan concentrations were significantly increased in diabetics compared with nondiabetic controls (2). In another case-control study of 40 participants,

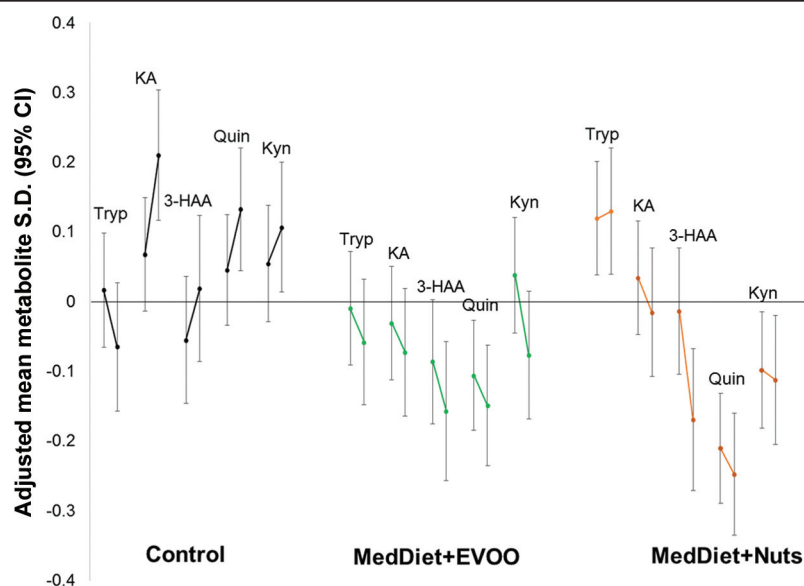

**Fig. 1.** Least mean squares 1-year changes in plasma metabolites under study according to intervention group.

Stratified by recruitment center. Adjusted for age (years), sex (male, female), body mass index ( $\text{kg}/\text{m}^2$ ), smoking (never, current, former), leisure-time physical activity (metabolic equivalent tasks in minutes/day), dyslipidemia, hypertension, and baseline glucose. KA, kynurenic acid; Quin, quinolinic acid.

**Table 2.** Hazard ratios (95% CI) for type 2 diabetes by baseline tryptophan metabolites.<sup>a</sup>

| 251 cases, 694 subcohort <sup>b</sup> |            |                  |                  |                  |                      |                  |                |
|---------------------------------------|------------|------------------|------------------|------------------|----------------------|------------------|----------------|
| Quartiles of baseline metabolites     |            |                  |                  |                  |                      |                  |                |
|                                       | Quartile 1 | Quartile 2       | Quartile 3       | Quartile 4       | P trend <sup>c</sup> | HR per SD        | P <sup>c</sup> |
| Model 1                               |            |                  |                  |                  |                      |                  |                |
| Tryptophan                            | 1.00 (ref) | 1.28 (0.80–2.05) | 1.68 (1.02–2.75) | 1.18 (0.67–2.08) | 0.56                 | 1.04 (0.86–1.26) | 0.69           |
| Kynurenine                            | 1.00 (ref) | 1.07 (0.64–1.76) | 1.13 (0.70–1.82) | 0.80 (0.48–1.34) | 0.56                 | 0.94 (0.79–1.11) | 0.56           |
| Kynurenic acid                        | 1.00 (ref) | 0.79 (0.48–1.32) | 1.17 (0.75–1.84) | 1.21 (0.76–1.92) | 0.56                 | 1.10 (0.92–1.33) | 0.56           |
| Quinolinic acid                       | 1.00 (ref) | 0.92 (0.56–1.49) | 0.72 (0.44–1.18) | 0.94 (0.58–1.51) | 0.57                 | 0.92 (0.78–1.08) | 0.56           |
| 3-HAA                                 | 1.00 (ref) | 0.93 (0.58–1.49) | 0.80 (0.49–1.30) | 0.69 (0.41–1.14) | 0.56                 | 0.91 (0.75–1.10) | 0.56           |
| Kyn/Trp ratio                         | 1.00 (ref) | 1.23 (0.76–1.98) | 1.10 (0.66–1.82) | 0.82 (0.49–1.37) | 0.56                 | 0.93 (0.79–1.10) | 0.56           |
| Model 2                               |            |                  |                  |                  |                      |                  |                |
| Tryptophan                            | 1.00 (ref) | 1.97 (1.10–3.52) | 3.26 (1.75–6.09) | 2.13 (1.12–4.05) | 0.045                | 1.29 (1.04–1.61) | 0.12           |
| Kynurenine                            | 1.00 (ref) | 1.58 (0.87–2.87) | 1.16 (0.64–2.08) | 0.90 (0.48–1.69) | 0.71                 | 0.99 (0.82–1.20) | 0.98           |
| Kynurenic acid                        | 1.00 (ref) | 0.88 (0.49–1.57) | 0.99 (0.56–1.75) | 1.13 (0.65–1.94) | 0.71                 | 1.07 (0.87–1.31) | 0.98           |
| Quinolinic acid                       | 1.00 (ref) | 1.12 (0.64–1.95) | 0.85 (0.47–1.54) | 1.02 (0.58–1.79) | 0.80                 | 0.97 (0.80–1.17) | 0.98           |
| 3-HAA                                 | 1.00 (ref) | 0.91 (0.49–1.67) | 1.07 (0.61–1.89) | 0.76 (0.40–1.44) | 0.71                 | 1.00 (0.80–1.24) | 0.98           |
| Kyn/Trp ratio                         | 1.00 (ref) | 1.49 (0.85–2.61) | 0.92 (0.49–1.74) | 0.62 (0.33–1.17) | 0.21                 | 0.85 (0.70–1.03) | 0.50           |

<sup>a</sup> All models stratified by recruitment center. Model 1 adjusted for age (years), sex (male, female), intervention group (control, MedDiet + EVOO, MedDiet + nuts), body mass index ( $\text{kg}/\text{m}^2$ ), smoking (never, current, former), leisure-time physical activity (metabolic equivalent tasks in minutes/day), dyslipidemia, and hypertension. Model 2 additionally adjusts for baseline glucose and baseline glucose  $\times$  baseline glucose.

<sup>b</sup> Fifty-three cases were also in the subcohort (overlapping cases).

<sup>c</sup> Adjusted with the False Discovery Rate method.

| Table 3. Hazard ratios (95% CI) for type 2 diabetes by 1-year changes in tryptophan metabolites. <sup>a</sup>                                                                                                                                                                                                                                                                                                                                                                                                    |            |                  |                  |                  |                      |                  |                |
|------------------------------------------------------------------------------------------------------------------------------------------------------------------------------------------------------------------------------------------------------------------------------------------------------------------------------------------------------------------------------------------------------------------------------------------------------------------------------------------------------------------|------------|------------------|------------------|------------------|----------------------|------------------|----------------|
| 180 cases, 546 subcohort <sup>b</sup>                                                                                                                                                                                                                                                                                                                                                                                                                                                                            |            |                  |                  |                  |                      |                  |                |
| Quartiles of 1-year changes in metabolites                                                                                                                                                                                                                                                                                                                                                                                                                                                                       |            |                  |                  |                  |                      |                  |                |
|                                                                                                                                                                                                                                                                                                                                                                                                                                                                                                                  | Quartile 1 | Quartile 2       | Quartile 3       | Quartile 4       | P trend <sup>c</sup> | HR per SD        | P <sup>c</sup> |
| Model 1                                                                                                                                                                                                                                                                                                                                                                                                                                                                                                          |            |                  |                  |                  |                      |                  |                |
| Tryptophan                                                                                                                                                                                                                                                                                                                                                                                                                                                                                                       | 1.00 (ref) | 1.24 (0.68-2.28) | 0.83 (0.43-1.60) | 0.94 (0.48-1.83) | 0.85                 | 0.97 (0.74-1.26) | 0.96           |
| Kynurenine                                                                                                                                                                                                                                                                                                                                                                                                                                                                                                       | 1.00 (ref) | 0.95 (0.52-1.74) | 0.65 (0.33-1.25) | 1.03 (0.58-1.86) | 0.85                 | 1.03 (0.83-1.29) | 0.96           |
| Kynurenic acid                                                                                                                                                                                                                                                                                                                                                                                                                                                                                                   | 1.00 (ref) | 0.80 (0.44-1.46) | 0.48 (0.25-0.93) | 0.57 (0.32-1.03) | 0.12                 | 0.81 (0.64-1.03) | 0.24           |
| Quinolinic acid                                                                                                                                                                                                                                                                                                                                                                                                                                                                                                  | 1.00 (ref) | 1.68 (0.87-3.23) | 2.17 (1.13-4.16) | 1.74 (0.94-3.24) | 0.18                 | 1.26 (1.02-1.55) | 0.18           |
| 3-HAA                                                                                                                                                                                                                                                                                                                                                                                                                                                                                                            | 1.00 (ref) | 0.85 (0.48-1.50) | 0.88 (0.51-1.52) | 1.05 (0.60-1.85) | 0.85                 | 1.03 (0.84-1.26) | 0.96           |
| Kyn/Trp ratio                                                                                                                                                                                                                                                                                                                                                                                                                                                                                                    | 1.00 (ref) | 1.05 (0.56-1.95) | 0.82 (0.43-1.56) | 1.00 (0.55-1.81) | 0.85                 | 1.00 (0.80-1.25) | 0.99           |
| Model 2                                                                                                                                                                                                                                                                                                                                                                                                                                                                                                          |            |                  |                  |                  |                      |                  |                |
| Tryptophan                                                                                                                                                                                                                                                                                                                                                                                                                                                                                                       | 1.00 (ref) | 1.03 (0.51-2.09) | 0.95 (0.44-2.02) | 0.64 (0.28-1.44) | 0.56                 | 0.92 (0.66-1.26) | 0.88           |
| Kynurenine                                                                                                                                                                                                                                                                                                                                                                                                                                                                                                       | 1.00 (ref) | 0.79 (0.38-1.63) | 0.57 (0.26-1.24) | 0.89 (0.44-1.81) | 0.73                 | 1.05 (0.79-1.39) | 0.88           |
| Kynurenic acid                                                                                                                                                                                                                                                                                                                                                                                                                                                                                                   | 1.00 (ref) | 1.15 (0.59-2.24) | 0.57 (0.25-1.31) | 0.67 (0.35-1.29) | 0.27                 | 0.85 (0.66-1.10) | 0.63           |
| Quinolinic acid                                                                                                                                                                                                                                                                                                                                                                                                                                                                                                  | 1.00 (ref) | 2.47 (1.06-5.78) | 2.85 (1.27-6.40) | 2.33 (1.09-4.96) | 0.18                 | 1.39 (1.09-1.77) | 0.047          |
| 3-HAA                                                                                                                                                                                                                                                                                                                                                                                                                                                                                                            | 1.00 (ref) | 0.87 (0.45-1.65) | 0.91 (0.48-1.72) | 0.97 (0.47-2.01) | 0.97                 | 1.02 (0.79-1.33) | 0.88           |
| Kyn/Trp ratio                                                                                                                                                                                                                                                                                                                                                                                                                                                                                                    | 1.00 (ref) | 0.94 (0.46-1.95) | 0.66 (0.31-1.41) | 0.92 (0.45-1.88) | 0.73                 | 0.97 (0.73-1.29) | 0.88           |
| <sup>a</sup> All models stratified by recruitment center. Model 1 adjusted for respective baseline metabolite values (continuous), age (years), sex (male, female), intervention group (control, MedDiet + EVOO, MedDiet + nuts), body mass index (kg/m <sup>2</sup> ), smoking (never, current, former), leisure-time physical activity (metabolic equivalent tasks in minutes/day), dyslipidemia, and hypertension. Model 2 additionally adjusts for baseline glucose and baseline glucose × baseline glucose. |            |                  |                  |                  |                      |                  |                |
| <sup>b</sup> Forty-one cases were also in the subcohort.                                                                                                                                                                                                                                                                                                                                                                                                                                                         |            |                  |                  |                  |                      |                  |                |
| <sup>c</sup> Adjusted with the False Discovery Rate method.                                                                                                                                                                                                                                                                                                                                                                                                                                                      |            |                  |                  |                  |                      |                  |                |

tryptophan was found to be metabolized more quickly, and concentrations of kynurenic acid and 3-HAA were increased in T2D patients (4). While we confirm findings by Wang et al. and Chen et al. for increased tryptophan levels in T2D patients, we did not find significant associations for any other baseline metabolite with incident T2D. Differences between results from previous studies and our study may be explained by both the study design (i.e., cross-sectional vs prospective) and subsequent definition of case status (i.e., prevalent vs incident cases), wherein longitudinal studies tended to report positive associations of tryptophan with T2D whereas cross-sectional studies tended to report null or inverse associations. The positive association between tryptophan and T2D became highly significant after adjusting for baseline glucose, possibly owing to mediating effect of glycemic level. Our initial hypothesis that plasma tryptophan concentrations would be inversely associated with T2D (as we had previously observed with cardiovascular disease (16)) was not supported when using baseline data alone. However, analyses using 1-year changes suggested a more dynamic picture: there may be initial compensatory increases in tryptophan at diabetes onset and then later depletion as diabetes progresses in severity.

Current knowledge of the role of the tryptophan–kynurenine pathway in T2D pathophysiology is unsettled.

IDO1, a rate-limiting enzyme for the conversion of tryptophan to kynurenine, is upregulated in response to inflammatory cytokines (29) and may act as a local compensatory mechanism to limit obesity-induced inflammation (30). Thus, in inflammatory states such as obesity, the tryptophan–kynurenine pathway may shift in favor of breakdown of tryptophan into downstream products (31, 32). This hypothesis is supported by our finding that the baseline Kyn/Trp ratio was positively associated with insulin resistance but that 1-year changes in the same ratio was inversely associated with insulin resistance. The resulting increases in downstream products (i.e., kynurenine, xanthurenic acid, 3-hydroxykynurenine) in insulin-resistant individuals have been reported in previous publications (33–35). Overproduction of these products in the context of an inflammatory milieu may shift the metabolism of 3-hydroxykynurenine in favor of excessive xanthurenic acid production, which has been implicated in diabetes pathology (36). P5P, the active form of vitamin B<sub>6</sub>, is a vital cofactor in this pathway, and disturbances in P5P balance in conjunction with upregulation of tryptophan metabolism have been proposed as a contributor to insulin resistance (9). Dysregulation of the tryptophan–kynurenine pathway has also been proposed as a possible explanation for the observed comorbidity of depression and T2D (37, 38), as alterations in

**Table 4. Least squares mean differences and associations of 1-year changes in HOMA-IR with baseline metabolite values (n = 217).<sup>a</sup>**

|                 | Quartile 1           | Quartile 2          | Quartile 3          | Quartile 4          | P trend <sup>b</sup> | Change per SD        | P <sup>b</sup> |
|-----------------|----------------------|---------------------|---------------------|---------------------|----------------------|----------------------|----------------|
| Tryptophan      | -0.89 (-1.26, -0.51) | -0.33 (-1.01, 0.35) | 0.42 (0.11, 0.73)   | 0.53 (0.32, 0.75)   | 0.24                 | 0.67 (0.46, 0.88)    | <0.001         |
| Kynurenine      | -0.31 (-0.90, 0.29)  | -0.21 (-1.23, 0.80) | 0.32 (-0.21, 0.84)  | 0.20 (-0.45, 0.86)  | 0.32                 | 0.13 (-0.18, 0.45)   | 0.55           |
| Kynurenic acid  | -0.53 (-1.28, 0.23)  | -0.06 (-0.49, 0.38) | -0.15 (-0.42, 0.13) | 0.65 (-0.11, 1.41)  | 0.24                 | 0.35 (0.23, 0.47)    | <0.001         |
| Quinolinic acid | -0.24 (-0.97, 0.49)  | 0.36 (-0.56, 1.28)  | -0.11 (-0.70, 0.48) | -0.12 (-0.89, 0.64) | 0.96                 | -0.01 (-0.37, 0.36)  | 0.98           |
| 3-HAA           | -0.43 (-1.29, 0.43)  | 0.02 (-0.42, 0.46)  | 0.53 (0.01, 1.06)   | -0.05 (-0.36, 0.26) | 0.24                 | 0.08 (-0.14, 0.30)   | 0.55           |
| Kyn/Trp ratio   | 0.31 (-0.18, 0.80)   | -0.17 (-0.52, 0.19) | -0.16 (-0.75, 0.43) | -0.08 (-0.67, 0.51) | 0.53                 | -0.18 (-0.34, -0.03) | 0.04           |

<sup>a</sup> All models stratified by recruitment center and adjusted for age (years), sex (male, female), intervention group (control, MedDiet + EVOO, MedDiet + nuts), body mass index (kg/m<sup>2</sup>), smoking (never, current, former), leisure-time physical activity (metabolic equivalent tasks in minutes/day), dyslipidemia, hypertension, baseline HOMA-IR, and baseline HOMA-IR × baseline HOMA-IR.

<sup>b</sup> Adjusted with the False Discovery Rate method.

**Table 5. Least squares mean differences and associations of 1-year changes in HOMA-IR with 1-year changes in metabolite values (n = 217).**

|                 | Quartile 1           | Quartile 2          | Quartile 3          | Quartile 4          | P trend <sup>b</sup> | Change per SD       | P <sup>b</sup> |
|-----------------|----------------------|---------------------|---------------------|---------------------|----------------------|---------------------|----------------|
| Tryptophan      | 0.32 (-0.55, 1.19)   | 0.11 (-0.46, 0.69)  | -0.08 (-0.56, 0.40) | -0.21 (-0.61, 0.19) | 0.43                 | -0.15 (-0.57, 0.27) | 0.49           |
| Kynurenine      | -0.59 (-0.86, -0.32) | 0.25 (-0.87, 1.37)  | -0.07 (-0.67, 0.52) | 0.54 (-0.06, 1.14)  | 0.23                 | 0.39 (0.17, 0.60)   | <0.001         |
| Kynurenic acid  | -0.62 (-1.06, -0.17) | 0.45 (-0.21, 1.11)  | 0.18 (-0.26, 0.63)  | -0.09 (-0.45, 0.27) | 0.23                 | 0.31 (-0.07, 0.69)  | 0.13           |
| Quinolinic acid | -0.41 (-0.61, -0.21) | -0.12 (-0.49, 0.25) | -0.15 (-0.86, 0.56) | 0.71 (-0.02, 1.45)  | 0.24                 | 0.49 (0.18, 0.80)   | 0.003          |
| 3-HAA           | -0.18 (-0.50, 0.15)  | 0.13 (-0.85, 1.10)  | 0.19 (-0.70, 1.08)  | 0.16 (-0.22, 0.54)  | 0.23                 | 0.23 (0.17, 0.30)   | <0.001         |
| Kyn/Trp ratio   | -0.33 (-0.55, -0.11) | 0.14 (-1.07, 1.35)  | -0.14 (-0.58, 0.29) | 0.32 (-0.10, 0.73)  | 0.23                 | 0.23 (0.16, 0.31)   | <0.001         |

<sup>a</sup> All models stratified by recruitment center and adjusted for respective baseline metabolite values (continuous), age (years), sex (male, female), intervention group (control, MedDiet + EVOO, MedDiet + nuts), body mass index (kg/m<sup>2</sup>), smoking (never, current, former), leisure-time physical activity (metabolic equivalent tasks in minutes/day), dyslipidemia, hypertension, baseline HOMA-IR, and baseline HOMA-IR × baseline HOMA-IR.

<sup>b</sup> Adjusted with the False Discovery Rate method.



this pathway may affect both serotonin balance and inflammatory pathways (38, 39). Our results suggest that tryptophan levels may initially be increased during pre-diabetes and then depleted in the transition into a full diabetic state. Furthermore, we found consistent results for both baseline quinolinic acid predicting T2D and changes in quinolinic acid predicting concurrent increases in HOMA-IR. In the Framingham Heart Study, kynurenine and quinolinic acid were both found to predict higher HOMA-IR (34). This may be explained by the interferon  $\gamma$ -induced activation of IDO1 (evidence by our observed association of HOMA-IR with Kyn/Trp ratio, which is an indicator of IDO1 or tryptophan 2, 3-dioxygenase 2 activity (40, 41)), which leads to increased production of toxic quinolinic acid (42).

We did not find significant effect modification by the assigned dietary treatment group on the association between baseline tryptophan and subsequent T2D. Richard et al. indicate that dietary modification for up to 10 days can lead to 15% to 20% changes in levels of plasma tryptophan (28). In a previous study of tryptophan metabolites and cardiovascular disease, we reported effect modification by diet, with a Mediterranean dietary pattern appearing to offset the effects of an unfavorable tryptophan profile (16). One possible explanation is that nuts are a rich source of vitamin B<sub>6</sub> (43), which may compensate for potential P5P depletion. In both the US and Spain, around 24% of individuals had insufficient plasma vitamin B<sub>6</sub> concentrations (44, 45). Thus, we continue to support a Mediterranean dietary pattern characterized by high intake of fruits, vegetables, whole grains, healthy oils, nuts, and legumes. Lastly, our finding that the intervention arms tended to decrease tryptophan metabolite concentrations while the control arm increased concentrations suggests that changes in these metabolites may partially explain the protective effect of the interventions on T2D.

Our study has several strengths and limitations. We used an efficient case - cohort design to study a clinical endpoint and its association with multiple plasma metabolites with repeated measures quantified by a validated LC-MS platform. Sampling at baseline preserved the prospective nature of the study and reduced the possibility of differential misclassification. The study power may be limited, as we did not assay blood specimens for the entire PREDIMED cohort, although this would be cost prohibitive. Collection of data on various lifestyle factors allowed us to adjust for potential confounders, but the possibility of residual or unmeasured confounding cannot be discounted and weakens our ability to draw causal conclusions. Because our study sample consisted mostly of white participants in the Mediterranean region, there is likely minimal confounding by ethnicity or geographical region. At the same time, our findings may not be

generalizable to other populations with different characteristics. Finally, we could not study several metabolites of interest, such as hydroxykynurenine or xanthurenic acid, as we did not target these molecules a priori.

We conclude from the present prospective study that among a population of individuals at high risk of cardiovascular disease, baseline tryptophan and 1-year changes in quinolinic acid were both positively associated with greater risk of incident T2D. Furthermore, baseline tryptophan and kynurenine acid and positive 1-year changes in kynurenine, quinolinic acid, 3-HAA, and Kyn/Trp ratio were associated with greater 1-year changes in HOMA-IR. Tryptophan may initially increase in early diabetes onset and then deplete as diabetes severity progresses.

**Author Contributions:** All authors confirmed they have contributed to the intellectual content of this paper and have met the following 3 requirements: (a) significant contributions to the conception and design, acquisition of data, or analysis and interpretation of data; (b) drafting or revising the article for intellectual content; and (c) final approval of the published article.

**Authors' Disclosures or Potential Conflicts of Interest:** Upon manuscript submission, all authors completed the author disclosure form. Disclosures and/or potential conflicts of interest:

**Employment or Leadership:** None declared.

**Consultant or Advisory Role:** J. Salas-Salvadó, the International Nut and Dried Fruit Foundation; E. Ros, Alexion, the California Walnut Commission.

**Stock Ownership:** None declared.

**Honoraria:** E. Ros, Alexion, California Walnut Commission, Merck, Sanofi.

**Research Funding:** This study was funded by the National Institutes of Health (R01DK102896, F31DK114938), the Spanish Ministry of Health (Instituto de Salud Carlos III, The PREDIMED Network grant RD 06/0045, 2006–2013, coordinated by M.A. Martínez-González; and a previous network grant RTIC-G03/140, 2003–2005, coordinated R. Estruch). Additional grants were received from the Ministerio de Economía y Competitividad-Fondo Europeo de Desarrollo Regional (Projects CNIC-06/2007, CIBER 06/03, PI06-1326, PI07-0954, PI11/02505, SAF2009-12304 and AGL2010–22319-C03-03) and by the Generalitat Valenciana (ACOMP2010-181, AP111/10, AP-042/11, ACOM2011/145, ACOMP/2012/190, ACOMP/2013/159 and ACOMP/213/165). C. Papandreou, postdoctoral fellowship granted by the Autonomous Government of Catalonia (PERIS 2016–2020 Incorporació de Científics I Tecnòlegs, SLT002/0016/00428); M. Guasch-Ferré, fellowship granted by the Private Foundation Daniel Bravo (Spain); E. Ros, the California Walnut Commission; J. Salas-Salvadó, grants from the International Nut and Dried Fruit Foundation.

**Expert Testimony:** None declared.

**Patents:** None declared.

**Role of Sponsor:** The funding organizations played no role in the design of study, choice of enrolled patients, review and interpretation of data, or final approval of manuscript.

**Acknowledgment:** The authors thank the contributions of Monica Bullo, Amy Diek, Dong Wang, and Yan Zheng, who provided invaluable assistance throughout the acquisition of data, analysis of data, and preparation of the manuscript.

## References

- Guariguata L, Whiting DR, Hambleton I, Beagley J, Linenkamp U, Shaw JE. Global estimates of diabetes prevalence for 2013 and projections for 2035. *Diabetes Res Clin Pract* 2014;103:137–49.
- Chen T, Zheng X, Ma X, Bao Y, Ni Y, Hu C, et al. Tryptophan predicts the risk for future type 2 diabetes. *PLoS One* 2016;11:e0162192.
- Floegel A, Stefan N, Yu Z, Mühlenbruch K, Drogan D, Joost H-G, et al. Identification of serum metabolites associated with risk of type 2 diabetes using a targeted metabolomic approach. *Diabetes* 2013;62:639–48.
- Matsuoka K, Kato K, Takao T, Ogawa M, Ishii Y, Shimizu F, et al. Concentrations of various tryptophan metabolites are higher in patients with diabetes mellitus than in healthy aged male adults. *Diabetol Int* 2017;8:69–75.
- Wang TJ, Larson MG, Vasan RS, Cheng S, Rhee EP, McCabe E, et al. Metabolite profiles and the risk of developing diabetes. *Nat Med* 2011;17:448–53.
- Schwarz R. The kynurenine pathway of tryptophan degradation as a drug target. *Curr Opin Pharmacol* 2004;4:12–7.
- Oxenkrug G, van der Hart M, Summergrad P. Elevated anthranilic acid plasma concentrations in type 1 but not type 2 diabetes mellitus. *Integr Mol Med* 2015;2:365–8.
- Bartoli M, Lamoche F, Baban B. Preventing hyperglycemia and tissue injury in diabetes: the dynamic role of 2,3 indoleamine dioxygenase (ido) in diabetes and its complications. In: Mozaffari MS, editor. *New strategies to advance pre/diabetes care: integrative approach by PPPM. Vol. 3. Dordrecht (Netherlands): Springer; 2013. p. 265–82.*
- Oxenkrug G. Insulin resistance and dysregulation of tryptophan–kynurenine and kynurenine–nicotinamide adenine dinucleotide metabolic pathways. *Mol Neurobiol* 2013;48:294–301.
- Oxenkrug GF. Increased plasma levels of xanthurenic and kynurenic acids in type 2 diabetes. *Mol Neurobiol* 2015;52:805–10.
- Oxenkrug G, Ratner R, Summergrad P. Kynurenines and vitamin B6: link between diabetes and depression. *J Bioinform Diabetes* 2013;1.
- Oxenkrug G. 3-hydroxykynurenic acid and type 2 diabetes: Implications for aging, obesity, depression, Parkinson's disease, and schizophrenia. In: Engin A, Engin AB, editors. *Tryptophan metabolism: implications for biological processes, health and disease. Cham (Switzerland): Humana Press; 2015. p. 173–95.*
- Muzik O, Burghardt P, Yi Z, Kumar A, Seyoum B. Successful metformin treatment of insulin resistance is associated with down-regulation of the kynurenine pathway. *Biochem Biophys Res Commun* 2017;488:29–32.
- Rebnord EW, Strand E, Midttun Ø, Svingen GFT, Christensen MHE, Ueland PM, et al. The kynurenine: tryptophan ratio as a predictor of incident type 2 diabetes mellitus in individuals with coronary artery disease. *Diabetologia* 2017;60:1712–21.
- Yu E, Ruiz-Canela M, Guasch-Ferre M, Zheng Y, Toledo E, Clish CB, et al. Increases in plasma tryptophan are inversely associated with incident cardiovascular disease in the Prevención con Dieta Mediterránea (PREDIMED) study. *J Nutr* 2017;147:314–22.
- Zazpe I, Sanchez-Tainta A, Estruch R, Lamuela-Raventós RM, Schröder H, Salas-Salvado J, et al. A large randomized individual and group intervention conducted by registered dietitians increased adherence to Mediterranean-type diets: the PREDIMED study. *J Am Diet Assoc* 2008;108:1134–44, discussion 45.
- Salas-Salvado J, Bulló M, Estruch R, et al. Prevention of diabetes with Mediterranean diets: a subgroup analysis of a randomized trial. *Ann Intern Med* 2014;160:1–10.
- Richardson MT, Leon AS, Jacobs DR, Jr., Ainsworth BE, Serfass R. Comprehensive evaluation of the Minnesota leisure time physical activity questionnaire. *J Clin Epidemiol* 1994;47:271–81.
- Townsend MK, Clish CB, Kraft P, Wu C, Souza AL, Deik AA, et al. Reproducibility of metabolomic profiles among men and women in 2 large cohort studies. *Clin Chem* 2013;59:1657–67.
- O'Sullivan JF, Morningstar JE, Yang Q, Zheng B, Gao Y, Jeanfavre S, et al. Dimethylguanidino valeric acid is a marker of liver fat and predicts diabetes. *J Clin Invest* 2017;127:4394–402.
- Paynter NP, Balasubramanian R, Giulianini F, Wang DD, Tinker LF, Gopal S, et al. Metabolic predictors of incident coronary heart disease in women. *Circulation* 2018;137:841–53.
- Matthews DR, Hosker JP, Rudenski AS, Naylor BA, Treacher DF, Turner RC. Homeostasis model assessment: insulin resistance and beta-cell function from fasting plasma glucose and insulin concentrations in man. *Diabetologia* 1985;28:412–9.
- American Diabetes Association. Diagnosis and classification of diabetes mellitus. *Diabetes Care* 2010;33:S62–S69.
- Blom G. *Statistical estimates and transformed beta-variables*. New York (NY): Wiley; 1958.
- Barlow WE, Ichikawa L, Rosner D, Izumi S. Analysis of case-cohort designs. *J Clin Epidemiol* 1999;52:1165–72.
- Benjamini Y, Hochberg Y. Controlling the false discovery rate: a practical and powerful approach to multiple testing. *J R Stat Soc Series B Stat Methodol* 1995;289–300.
- Richard DM, Dawes MA, Mathias CW, Acheson A, Hill-Kapturczak N, Dougherty DM. L-tryptophan: basic metabolic functions, behavioral research and therapeutic indications. *Int J Tryptophan Res* 2009;2:45–60.
- Oxenkrug GF. Interferon-gamma-inducible kynurenines/pteridines inflammation cascade: implications for aging and aging-associated psychiatric and medical disorders. *J Neural Transm (Vienna)* 2011;118:75–85.
- Wolowczuk I, Hennart B, Leloire A, Bessede A, Soichot M, Taront S, et al. Tryptophan metabolism activation by indoleamine 2,3-dioxygenase in adipose tissue of obese women: an attempt to maintain immune homeostasis and vascular tone. *Am J Physiol Regul Integr Comp Physiol* 2012;303:R135–R143.
- Brandacher G, Hoeller E, Fuchs D, Weiss HG. Chronic immune activation underlies morbid obesity: is ido a key player? *Curr Drug Metab* 2007;8:289–95.
- Unluturk U, Erbas T. Diabetes and tryptophan metabolism. In: Engin A, Engin AB, editors. *Tryptophan metabolism: implications for biological processes, health and disease. Cham (Switzerland): Humana Press; 2015. p. 147–72.*
- Favennec M, Hennart B, Caiazzo R, Leloire A, Yengo L, Verbanck M, et al. The kynurenine pathway is activated in human obesity and shifted toward kynurenine monooxygenase activation. *Obesity* 2015;23:2066–74.
- Ho JE, Larson MG, Ghorbani A, Cheng S, Chen M-H, Keyes M, et al. Metabolomic profiles of body mass index in the Framingham Heart Study reveal distinct cardiometabolic phenotypes. *PLoS One* 2016;11:e0148361.
- Reginaldo C, Jacques P, Scott T, Oxenkrug G, Selhub J, Paul L. Xanthurenic acid is associated with higher insulin resistance and higher odds of diabetes. *FASEB J* 2015;29.
- Oxenkrug GF. Role of kynurenine pathway in insulin resistance: toward kynurenine hypothesis of insulin resistance and diabetes. In: Mittal S, editor. *Targeting the broadly pathogenic kynurenine pathway. Cham (Switzerland): Springer; 2015;169–78.*
- Moulton CD, Pickup JC, Ismail K. The link between depression and diabetes: the search for shared mechanisms. *Lancet Diabetes Endocrinol* 2015;3:461–71.
- Stuart MJ, Baune BT. Depression and type 2 diabetes: inflammatory mechanisms of a psychoneuroendocrine co-morbidity. *Neurosci Biobehav Rev* 2012;36:658–76.
- Oxenkrug GF. Metabolic syndrome, age-associated neuroendocrine disorders, and dysregulation of tryptophan–kynurenine metabolism. *Ann NY Acad Sci* 2010;1199:1–14.
- Fuchs D, Weiss G, Reibnegger G, Wachter H. The role of neopterin as a monitor of cellular immune activation in transplantation, inflammatory, infectious, and malignant diseases. *Crit Rev Clin Lab Sci* 1992;29:307–41.
- Badawy AAB. Kynurenine pathway of tryptophan metabolism: regulatory and functional aspects. *Int J Tryptophan Res* 2017;10:1178646917691938.
- Coutinho LG, Christen S, Bellac CL, Fontes FL, de Souza FRS, Grandgirard D, et al. The kynurenine pathway is involved in bacterial meningitis. *J Neuroinflammation* 2014;11:169.
- Dreher ML, Maher CV, Kearney P. The traditional and emerging role of nuts in healthful diets. *Nutr Rev* 1996;54:241–5.
- Morris MS, Picciano MF, Jacques PF, Selhub J. Plasma pyridoxal 5'-phosphate in the US population: the national health and nutrition examination survey, 2003–2004. *Am J Clin Nutr* 2008;87:1446–54.
- Planells E, Sanchez C, Montellano MA, Mataix J, Llopis J. Vitamins B6 and B12 and folate status in an adult Mediterranean population. *Eur J Clin Nutr* 2003;57:777–85.
